# Supplementary material
Source: PubMed Central journal article supplement (PMC8982535)
Supplement: EMBR-23-e53354-s001.pdf [file EMBR-23-e53354-s001.pdf]

## Appendix Content

**Appendix Figure S1. Dwarf phenotype of the *ubp12i/ubp13* double mutant (p1)**

**Appendix Figure S2. Loss of UBP12 and UBP13 decreased BR sensitivity, whereas overexpressing *UBP13* led to BR hypersensitivity in *Arabidopsis* (p2)**

**Appendix Figure S3. Characterization of BRI1-mCit/*bri1/ubp12i/ubp13* and BRI1<sub>25KR</sub>-mCit/*bri1/ubp12i/ubp13* (p3)**

**Appendix Figure S4. BRI1 protein stability decreases in *ubp12i/ubp13* double mutant (p4)**

**Appendix Figure S5. PUB13 catalyzes K63-linked polyubiquitin chains on BRI1 (p5)**

**Appendix Figure S6. Deubiquitination of BRI1 expressed in *Arabidopsis* plants by recombinant UBP13 (p6)**

**Appendix Figure S7. BL-responsive phenotypes of BRI1-mCit/*bri1/ubp12i/ubp13* and BRI1<sub>25KR</sub>-mCit/*bri1/ubp12i/ubp13* (p7)**

**Appendix Table S1. Primers used in this study (p8)**

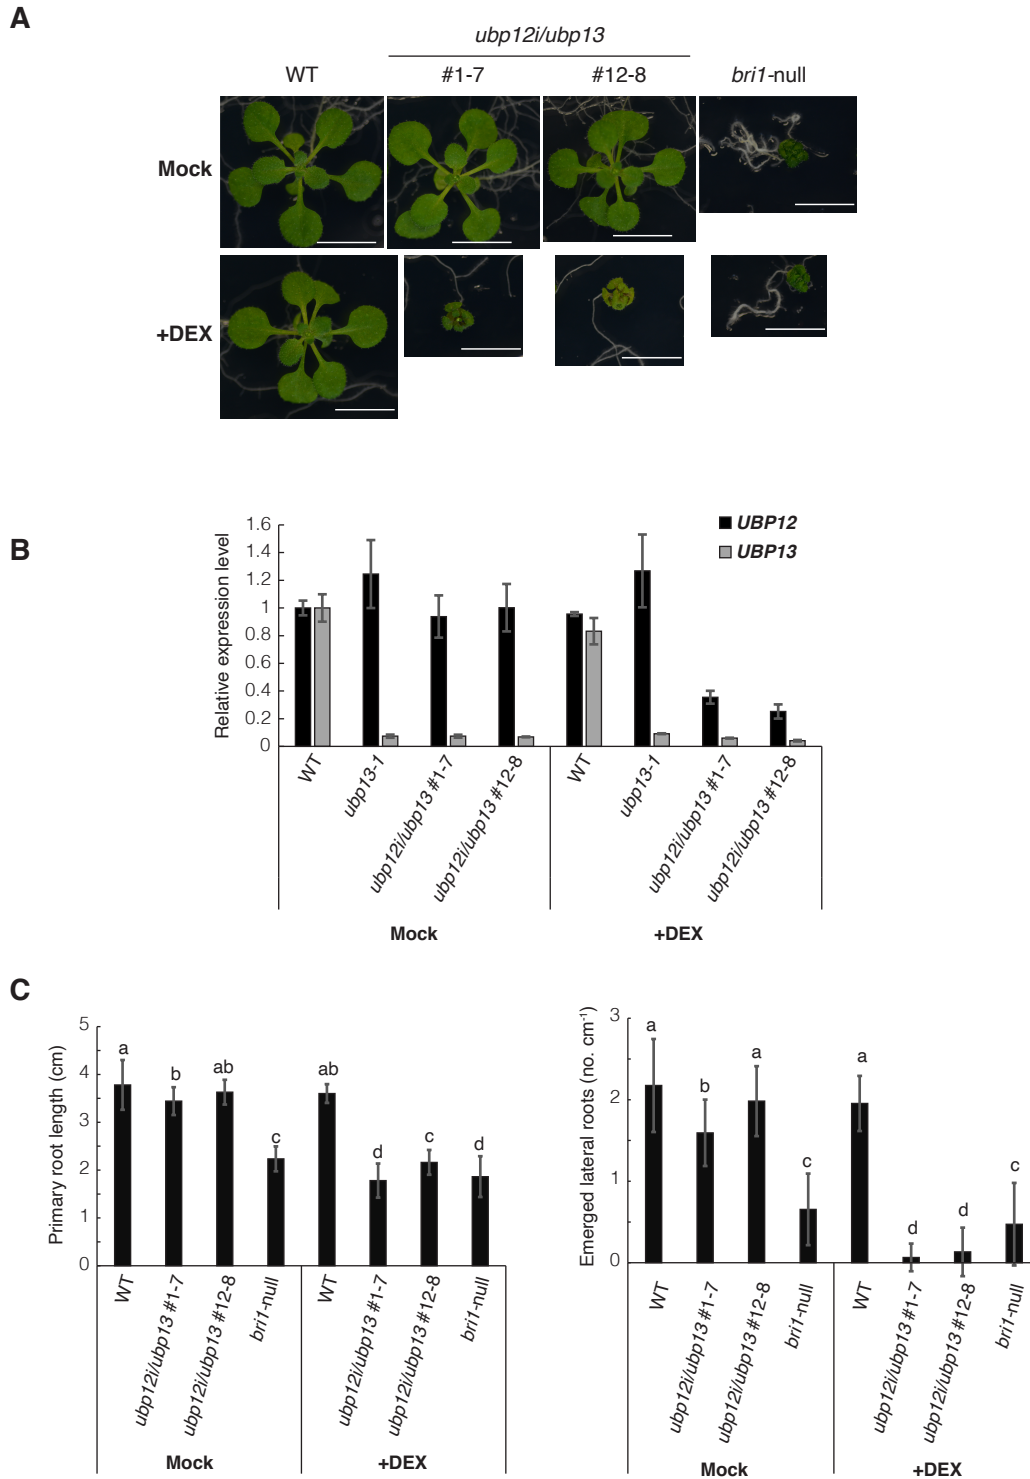

### Appendix Figure S1. Dwarf phenotype of the *ubp12i/ubp13* double mutant

A Growth phenotypes of the wild-type (WT), *bri1*-null mutant, and *ubp12i/ubp13* double mutant grown on 1/2MS medium supplemented with 10  $\mu$ M DEX (+DEX) or without DEX (Mock) for 18 days. Scale bars: 10 mm.

B Transcript levels of the *UBP12* and *UBP13* genes in the double mutants. Total RNA was isolated from 6-day-old seedlings grown on 1/2MS medium supplemented with 10  $\mu$ M DEX or not (Mock). The expression levels of *UBP12* and *UBP13* were assessed by qRT-PCR relative to that in WT grown on mock medium. The expression of *ACTIN7* was used as an internal control (n = 3 biological replicates).

C Root growth defects in the *ubp12i/ubp13* double mutant. Seedlings were grown on 1/2MS medium supplemented with 10  $\mu$ M DEX or not (mock) for 11 days and used for measurement of primary root lengths (left) and emerged lateral root densities (right) (n > 20 seedlings for each line).

Data information: data are presented as means  $\pm$  SD (B and C).  $P < 0.05$  (one-way ANOVA and post-hoc Tukey's test) (C).

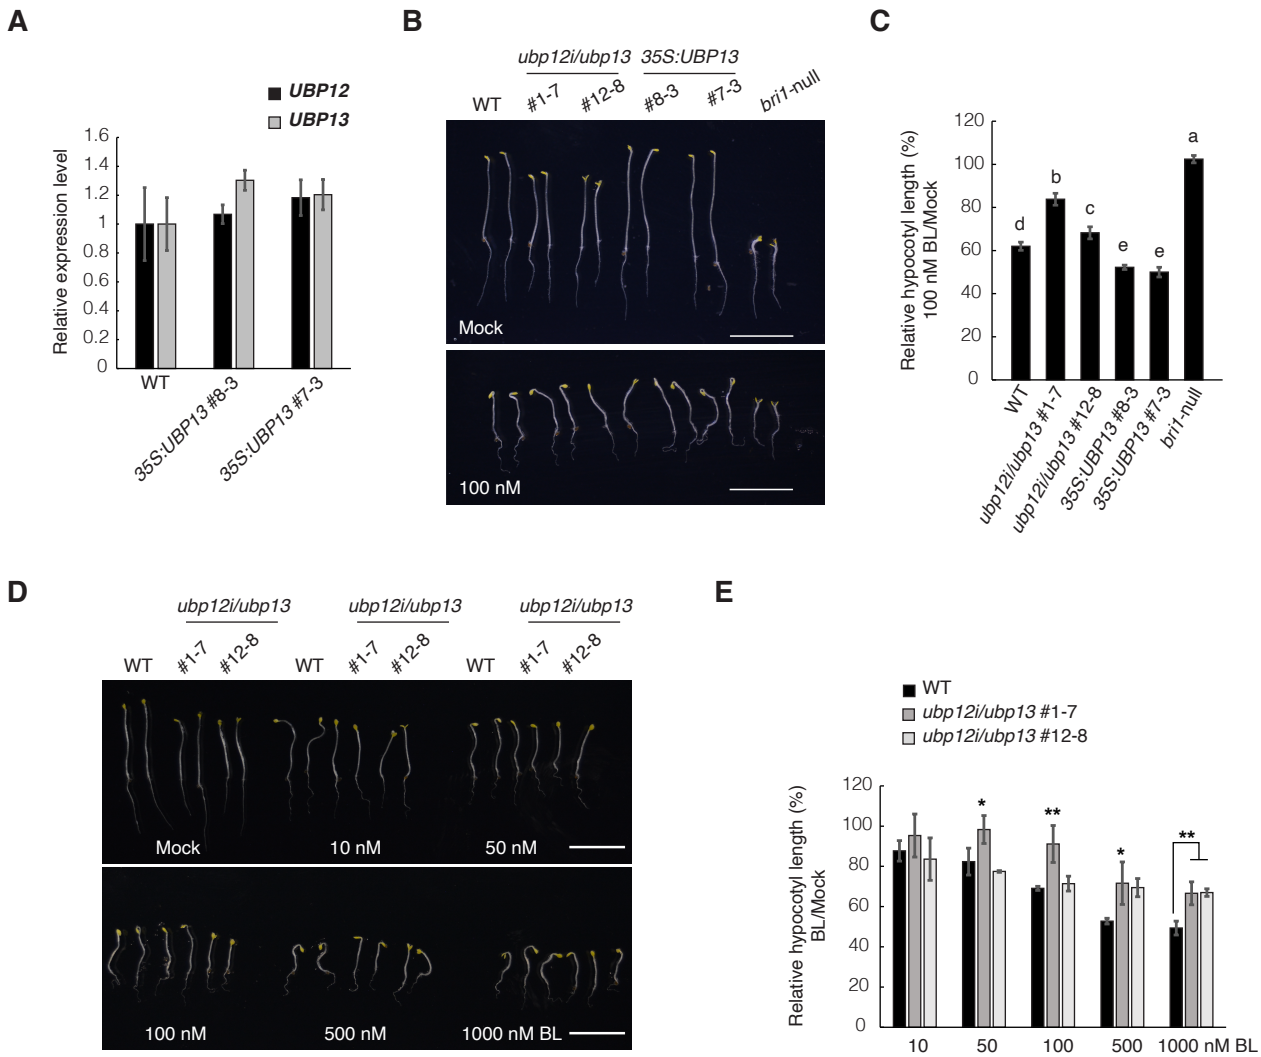

## Appendix Figure S2. Loss of UBP12 and UBP13 decreased BR sensitivity, whereas overexpressing UBP13 led to BR hypersensitivity in *Arabidopsis*

A Transcript levels of the *UBP12* and *UBP13* genes in the *35S:UBP13* lines. Total RNA was isolated from 6-day-old dark-grown seedlings. The expression levels of *UBP12* and *UBP13* were assessed by qRT-PCR relative to that in WT. The expression of *18S rRNA* was used as an internal control (n = 3 biological replicates).

B Phenotype of WT, *ubp12i/ubp13* double mutant, two independent lines of *35S:UBP13*, and *bri1-null* mutant grown on DEX medium in the presence of 100 nM BL or not (Mock) in the dark for 6 days. Scale bars: 10 mm.

C Hypocotyl length relative to the mock control of seedlings (B). Experiments were done in triplicate (n > 15 seedlings for each line).

D Phenotype of the WT and *ubp12i/ubp13* double mutant grown on DEX medium in the presence of increasing concentrations of BL in the dark for 6 days. Scale bars: 10 mm.

E Hypocotyl length relative to the mock control of seedlings (D). Experiments were done in triplicate (n > 15 seedlings for each line).

Data information: data are presented as means  $\pm$  SD (A, C, and E).  $P < 0.05$  (one-way ANOVA and post-hoc Tukey's test) (C), \* $P < 0.05$ , \*\* $P < 0.01$  compared with WT under each condition (one-way ANOVA and post-hoc Tukey's test) (E).

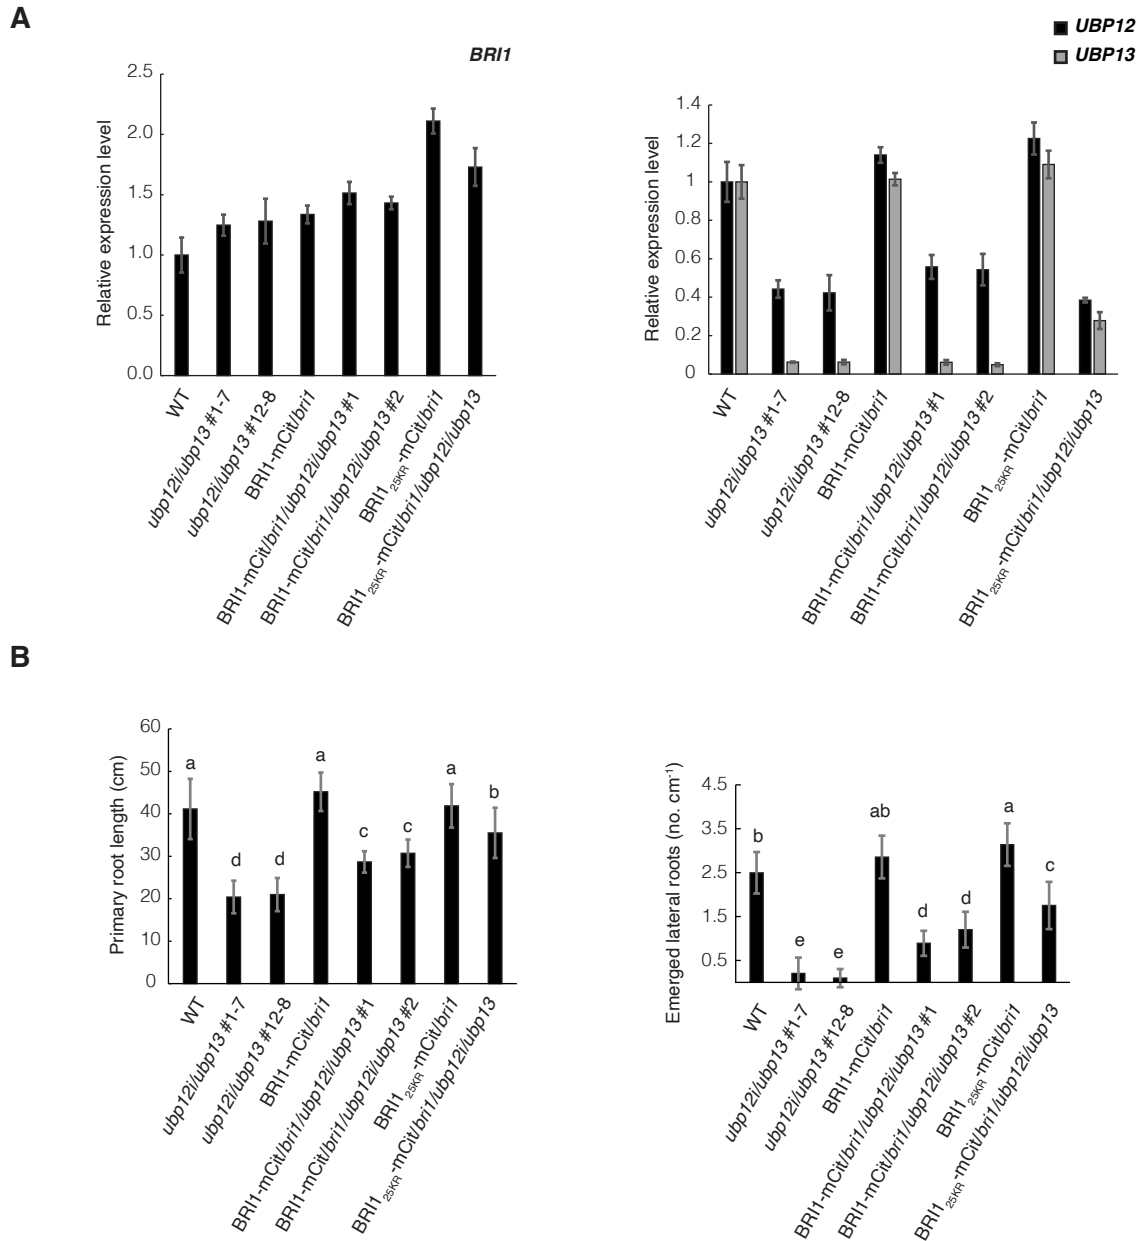

**Appendix Figure S3. Characterization of *BRI1-mCit/bri1/ubp12i/ubp13* and *BRI1<sub>25KR</sub>-mCit-/bri1/ubp12i/ubp13***

A Transcript levels of the *BRI1*, *UBP12*, and *UBP13* genes. Total RNA was isolated from 7-day-old seedlings grown on DEX medium. The expression levels of *BRI1*, *UBP12* and *UBP13* were assessed by qRT-PCR relative to that in WT. The expression of *18S rRNA* was used as an internal control (n = 3 biological replicates).

B Root growth defects in transgenic lines in the *ubp12i/ubp13* background. Seedlings were grown on DEX medium for 11 days and used for measurement of primary root lengths (left) and emerged lateral root densities (right) (n > 20 seedlings for each line).

Data information: data are presented as means ± SD.  $P < 0.05$  (one-way ANOVA and post-hoc Tukey's test) (B).

**A**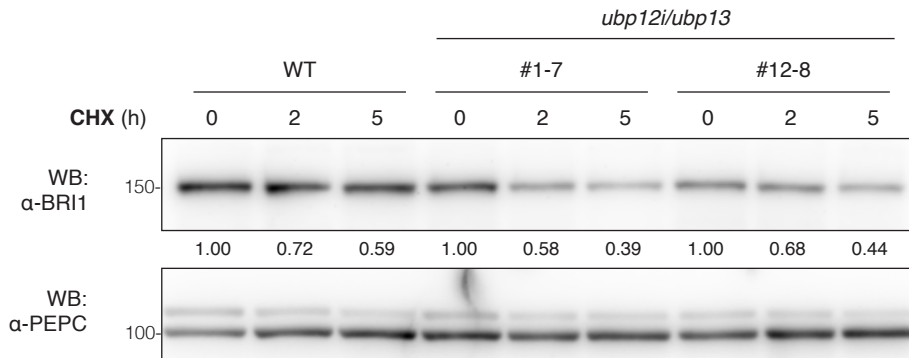**B**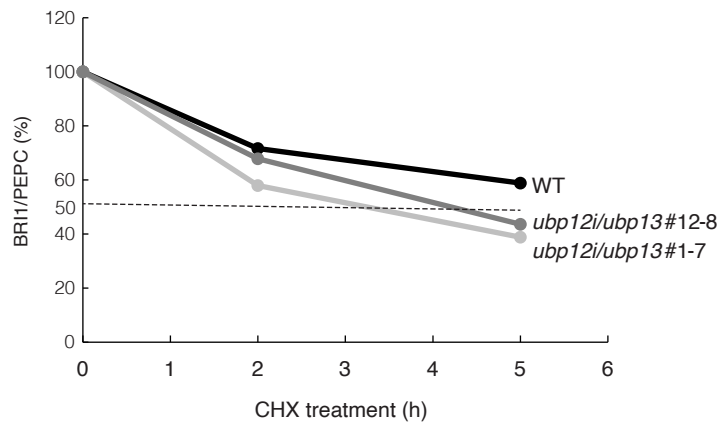

#### Appendix Figure S4. BRI1 protein stability decreases in *ubp12i/ubp13* double mutant

A Eighteen-day-old plants grown on DEX medium transferred to 1/2MS liquid medium with 200  $\mu$ M CHX in the presence of 10  $\mu$ M DEX for the indicated time. BRI1 proteins were analyzed by western blot with an  $\alpha$ -BRI1 antibody. PEPC was used as a loading control. The values shown above each lane indicate the abundance of the BRI1 proteins relative to that of samples before CHX treatment in the respective lines.

B Degradation rates of BRI1 proteins (A) plotted over time. The relative protein abundance of BRI1 proteins before CHX treatment was set to 100% in the respective lines ( $n = 1$  biological replicate).

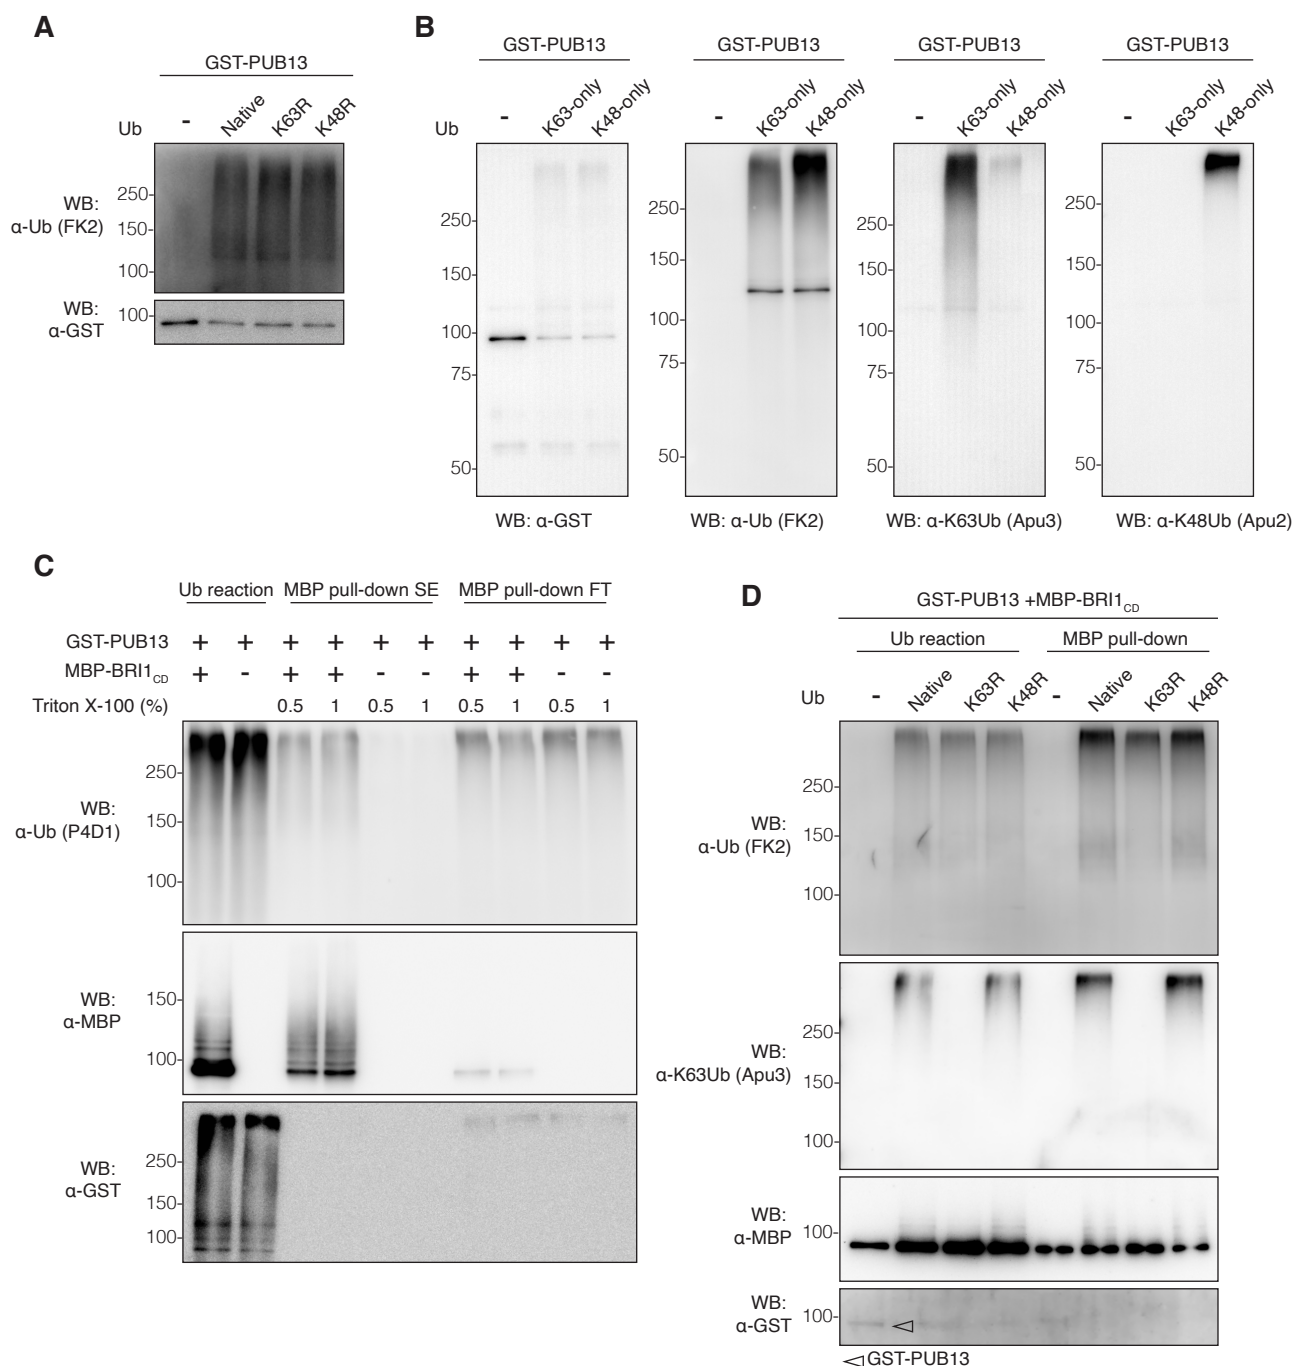

## Appendix Figure S5. PUB13 catalyzes K63-linked polyubiquitin chains on BRI1

A,B K63- and K48-autoubiquitination activities of PUB13 *in vitro*. GST-PUB13 was incubated without (-) or with native ubiquitin (Native), K63R, or K48R ubiquitin (A) and K63- or K48-only ubiquitin (B). PUB13 ubiquitination was analyzed by western blot with  $\alpha$ -Ub (FK2),  $\alpha$ -K63Ub (Apu3),  $\alpha$ -K48Ub (Apu2), and  $\alpha$ -GST antibodies.

C Purification of polyubiquitinated MBP-BRI1<sub>CD</sub> by MBP pull-down assay. *In vitro* ubiquitination assays produced polyubiquitinated MBP-BRI1<sub>CD</sub> and polyubiquitinated GST-PUB13 mixture or polyubiquitinated GST-PUB13 alone (Ub reaction) were incubated with amylose resin to purify MBP-BRI1<sub>CD</sub> (MBP pull-down). Resins were washed in wash buffer containing 0.5% or 1% (v/v) Triton X-100 after incubation for dissociation of nonspecific bindings (flow through [FT]). Polyubiquitinated MBP-BRI1<sub>CD</sub> eluted from the amylose resin by SDS sample buffer (SE). The ubiquitinated proteins were detected by western blot with an  $\alpha$ -Ub (P4D1) antibody. The presence of recombinant proteins was confirmed by  $\alpha$ -GST and  $\alpha$ -MBP antibodies.

D K63-ubiquitination of BRI1 by PUB13 *in vitro*. MBP-BRI1<sub>CD</sub> was incubated with GST-PUB13 in the presence of native ubiquitin or ubiquitin variants or in the absence of ubiquitin (-). Polyubiquitinated MBP-BRI1<sub>CD</sub> was purified by MBP pull-down assay and analyzed by western blot with  $\alpha$ -Ub (FK2) and  $\alpha$ -K63Ub (Apu3) antibodies.

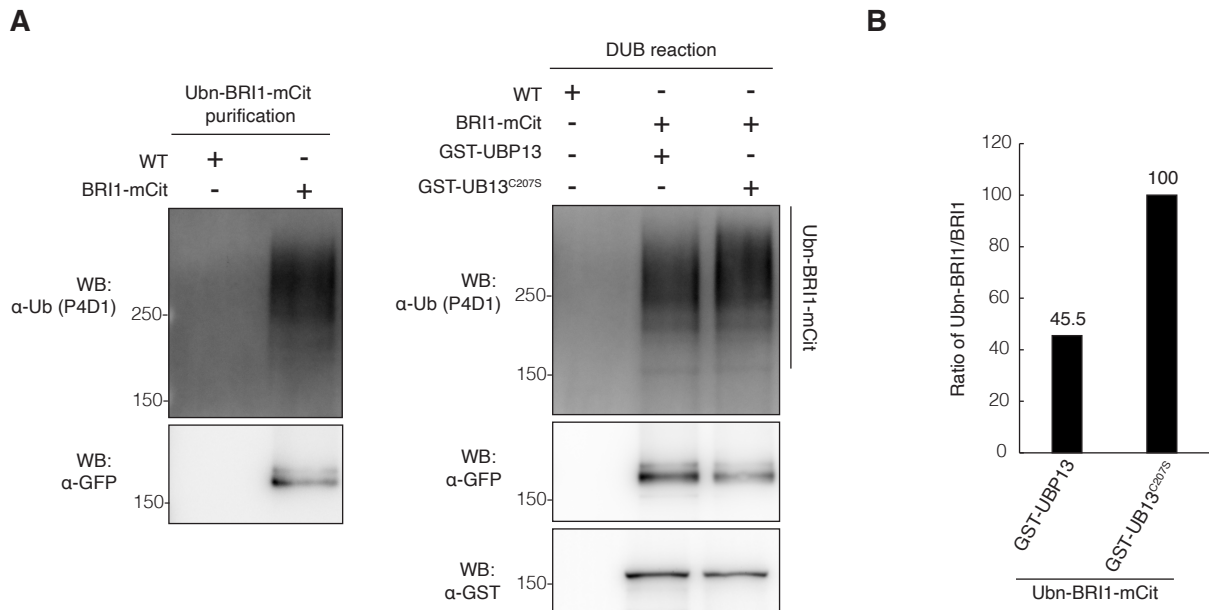

### Appendix Figure S6. Deubiquitination of BRI1 expressed in *Arabidopsis* plants by recombinant UBP13

A Cell-free deubiquitination assay of polyubiquitinated BRI1-mCit proteins by GST-UBP13. Polyubiquitinated BRI1-mCit proteins were extracted from 18-day-old BRI1-mCit/*bri1* plants (left) and incubated with GST-UBP13 or GST-UBP13<sup>C207S</sup> for 10 h (right). BRI1 ubiquitination was analyzed by western blot with  $\alpha$ -Ub (P4D1) and  $\alpha$ -GFP antibodies. The presence of GST-UBP13 or GST-UBP13<sup>C207S</sup> recombinant proteins was confirmed by the  $\alpha$ -GST antibody.

B Quantification of BRI1 ubiquitination profiles from the band intensities (A). Data are presented as ratios of ubiquitinated BRI1 (P4D1)-to-basal BRI1 (GFP), shown as numbers above each bar. The ratio of sample incubated with GST-UBP13<sup>C207S</sup> was set to 100 ( $n = 1$  biological replicate).

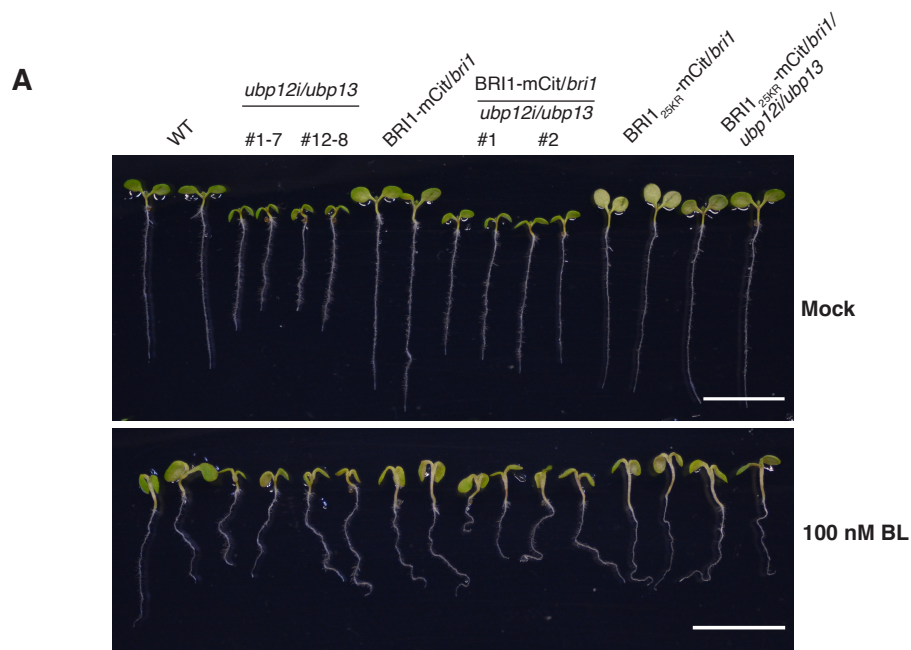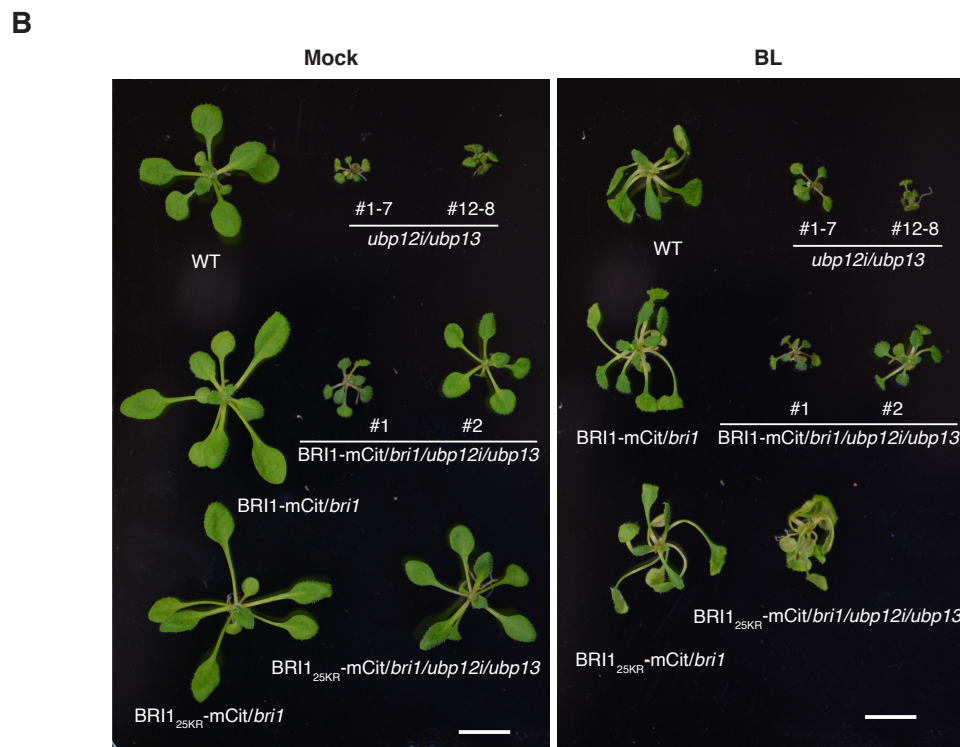

**Appendix Figure S7. BL-responsive phenotypes of *BRI1-mCit/bri1/ubp12i/ubp13* and *BRI1<sub>25KR</sub>-mCit-/bri1/ubp12i/ubp13***

A Phenotype of transgenic lines expressing *BRI1* or *BRI1<sub>25KR</sub>* tagged with mCitrine in either the *UBP12/UBP13* or *ubp12i/ubp13* background grown on DEX medium in the presence of 100 nM BL or not (mock) in the light for 6 days. Scale bars: 10 mm.

B Growth phenotype of the indicated lines grown on DEX medium for 10 days, then transferred to fresh DEX medium containing 1  $\mu$ M BL or mock solution (0.1% [v/v] EtOH) for additionally 8 days. Scale bar: 10 mm.



**Appendix Table S1. Primers used in this study**

|                   | <b>Primer name</b> | <b>Sequence (5'→3')</b>        |
|-------------------|--------------------|--------------------------------|
| <b>Cloning</b>    | UBP13 ent 5-1      | CACCATGACTATGATGACTCCGC        |
|                   | UBP13 ent 3-1      | CTAATTGTATATTTTCACCGGCTTCTCG   |
|                   | UBP12RNAi Si_R     | CACCTATACCACATACCTTACTTCAGAAAG |
|                   | UBP12RNAi Si R     | AAAGAAGCATAAACATCCTTGCAG       |
|                   | BRI1 ent 5-1       | CACCATGAAGACTTTTTCAAGCTTC      |
|                   | BRI1 ent 3-1       | TAATTTTCCTTCAGGAACTTC          |
|                   | UBP13 C207S 5      | GGTGCTACCAGTTACATGAATT         |
|                   | UBP13 C207S 3      | AATTCATGTAAGTGGTAGCACC         |
|                   | CIPK8 ent 5-1      | CACCATGGTGGTAAGGAAGGT          |
|                   | CIPK8 ent 3-1      | CAAGGCCAAGAGTAAAAGACGT         |
| <b>Genotyping</b> | ubp13-1 LP         | GTCTGGCTGTAGTGAATCAAGTC        |
|                   | ubp13-1 RP         | TAATGCCCTCCATGCACTCC           |
|                   | bri1 LP            | GAATCTATCCGCTTCGTTGC           |
|                   | bri1 RP            | AATTCGACCGAGCCCGAAAA           |
| <b>qRT-PCR</b>    | UBP13 exp FP       | GTGCGTGGGAGCAGTATCTT           |
|                   | UBP13 exp RP       | GCGTGTCGGTTCTGATTTG            |
|                   | UBP12 exp FP       | TCTGGACATCCCTCTTCCAG           |
|                   | UBP12 exp RP       | CGACCGTGCTTTGTTTAGGTA          |
|                   | BRI1 exp FP        | CAACTGCAGTCCGCATATCA           |
|                   | BRI1 exp RP        | AAACCCGAGCTTCCAATTC            |
